# Supplementary material for: Noble metal clusters protected with mixed proteins exhibit intense photoluminescence
Source: Royal Society of Chemistry journal article supplement (doi:10.1039/c5ra06964e), 2015-01-01
Supplement: c5ra06964e1.pdf [file c5ra06964e1.pdf]

## Electronic Supplementary Information

### Clusters protected with mixed proteins exhibiting intense photoluminescence

Jyoti Sarita Mohanty,<sup>‡</sup> Ananya Bakshi,<sup>‡</sup> Haiwon Lee and T. Pradeep\*

<sup>1</sup>DST Unit of Nanoscience (DST UNS), and Thematic Unit of Excellence (TUE),

Department of Chemistry, Indian Institute of Technology Madras, Chennai - 600 036, India

<sup>2</sup>Department of Chemistry, Institute of Nanoscience and Technology, Hanyang University,  
Seoul- 133-791, Korea.

<sup>‡</sup> Contributed equally

#### Content

| S/N | Description                                                                                                               | Page Number |
|-----|---------------------------------------------------------------------------------------------------------------------------|-------------|
| S1  | <i>Comparative MALDI MS of BSA and ~Au<sub>30</sub>@BSA</i>                                                               | 2           |
| S2  | <i>Comparative MALDI MS of ~Au<sub>30</sub>@BSA, Au<sub>10</sub>@Lyz and Au<sub>QC</sub>@BSA-Lyz at lower mass region</i> | 3           |
| S3  | <i>MALDI MS of Lyz shows the aggregate formation</i>                                                                      | 4           |
| S4  | <i>MALDI MS of Au<sup>+</sup>-Lyz adduct showing multiple Au attachments to the parent protein</i>                        | 5           |
| S5  | <i>MALDI MS of BSA-Lyz is showing aggregate formation between two proteins</i>                                            | 6           |
| S6  | <i>XPS survey spectrum of Au<sub>QC</sub>@BSA-Lyz</i>                                                                     | 7           |
| S7  | <i>UV-Vis absorption spectra of Au<sub>QC</sub>@BSA-Lyz, ~Au<sub>30</sub>@BSA and Au<sub>10</sub>@Lyz</i>                 | 8           |
| S8  | <i>Concentration dependent MALDI MS of Ag<sub>QC</sub>@BSA-Lyz</i>                                                        | 9           |

Electronic Supplementary Information 1

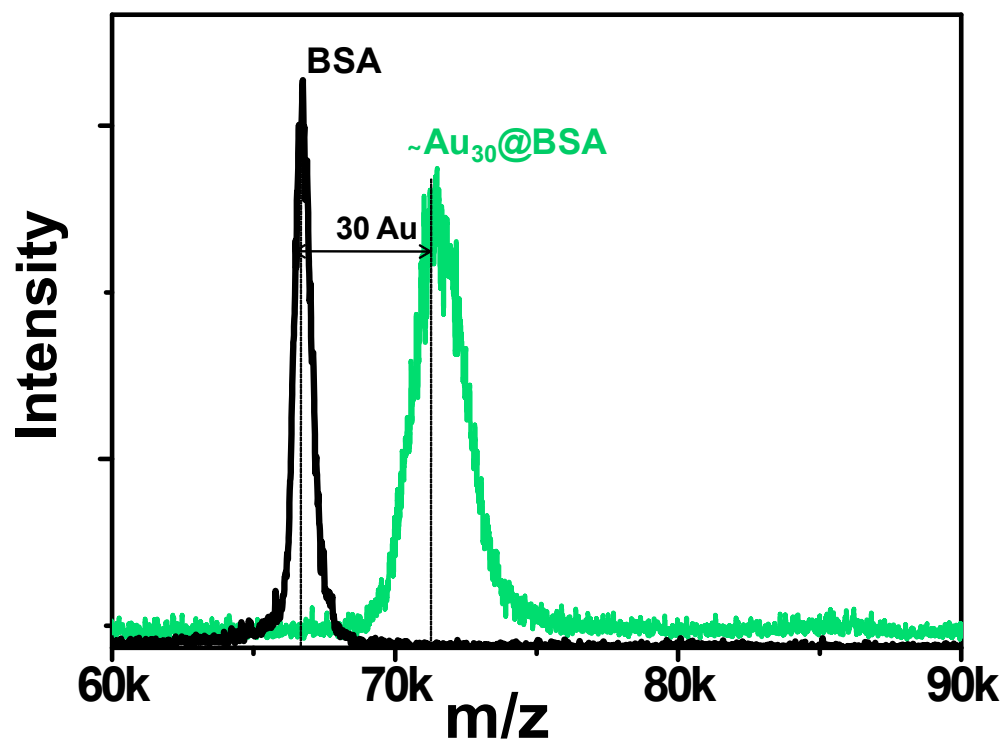

**Figure S1:** Comparative MALDI MS of BSA and Au<sub>QC</sub>@BSA showing mass shift of 6 kDa from parent protein after cluster formation. The cluster is assigned as ~Au<sub>30</sub>@BSA.

Electronic Supplementary Information 2

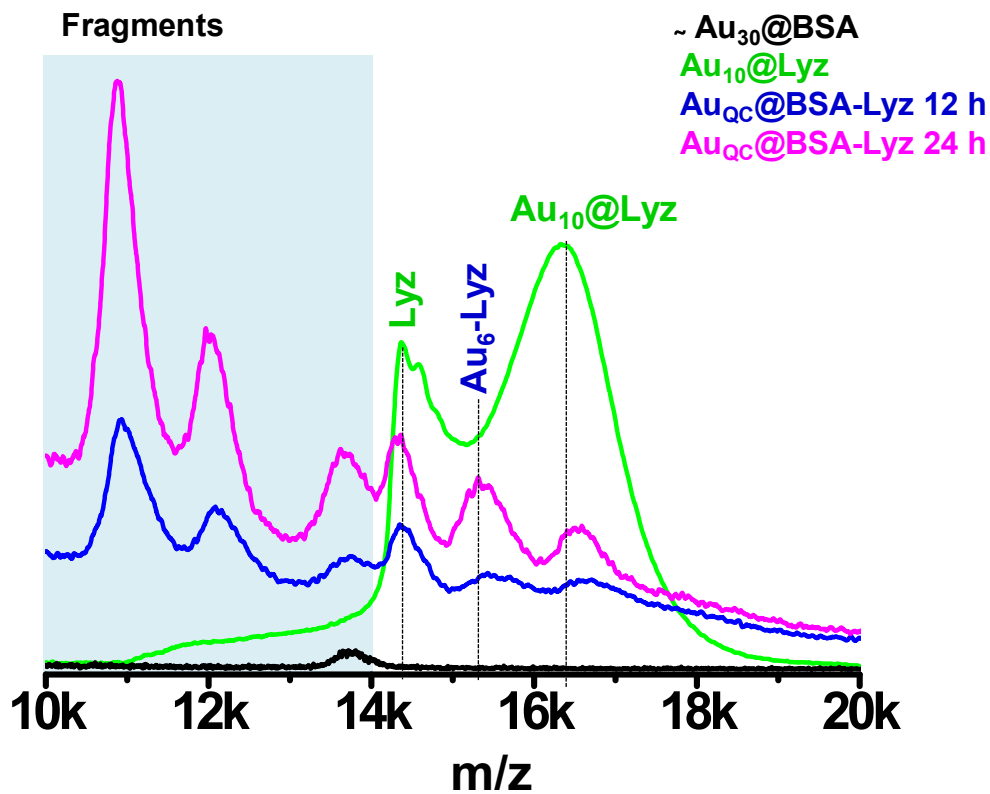

**Figure S2:** Comparative MALDI MS of  $\sim\text{Au}_{30}\text{@BSA}$ ,  $\text{Au}_{10}\text{@Lyz}$  and  $\text{Au}_{\text{QC}}\text{@BSA-Lyz}$  at lower mass region showing a few Au attachments to Lyz along with other fragments.

Electronic Supplementary Information 3

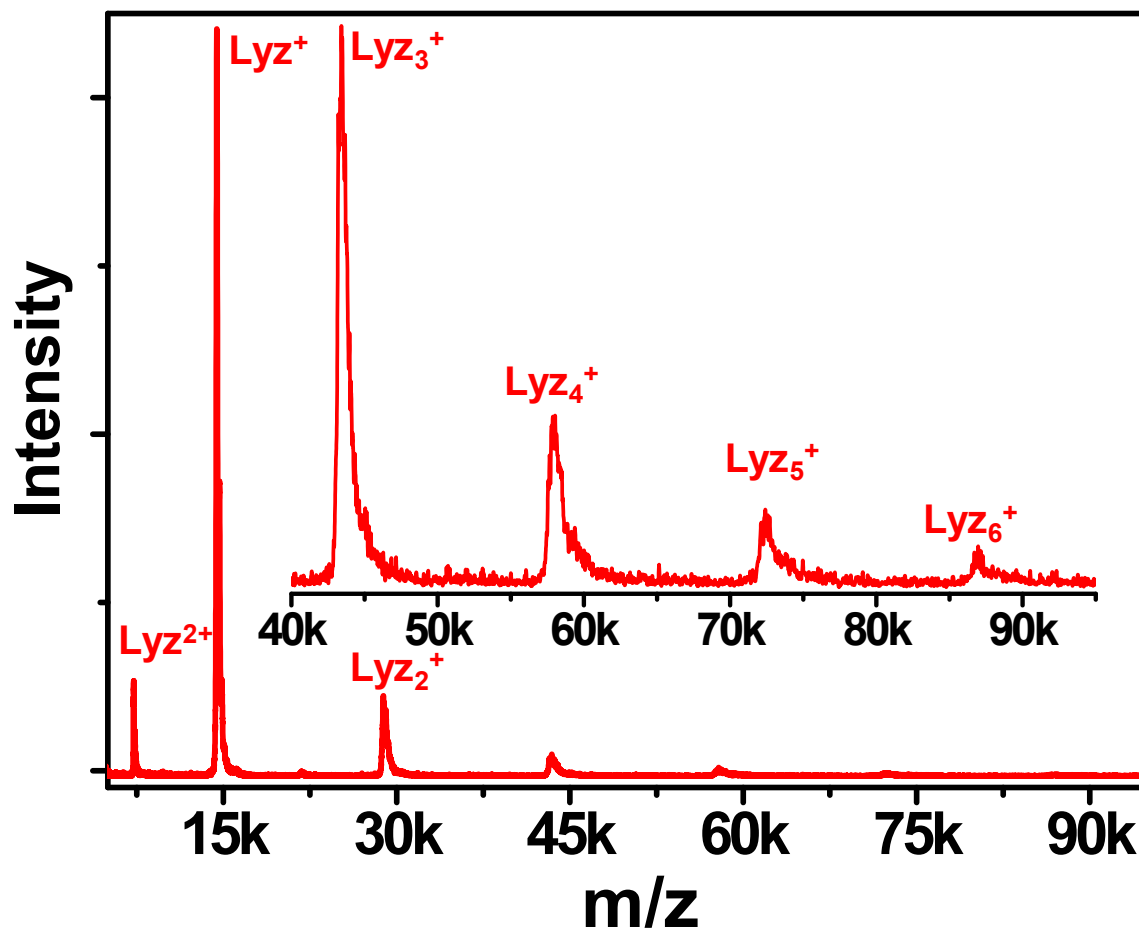

Figure S3: MALDI MS of Lyz is showing aggregate formation. Up to hexamer is clearly visible.

Electronic Supplementary Information 4

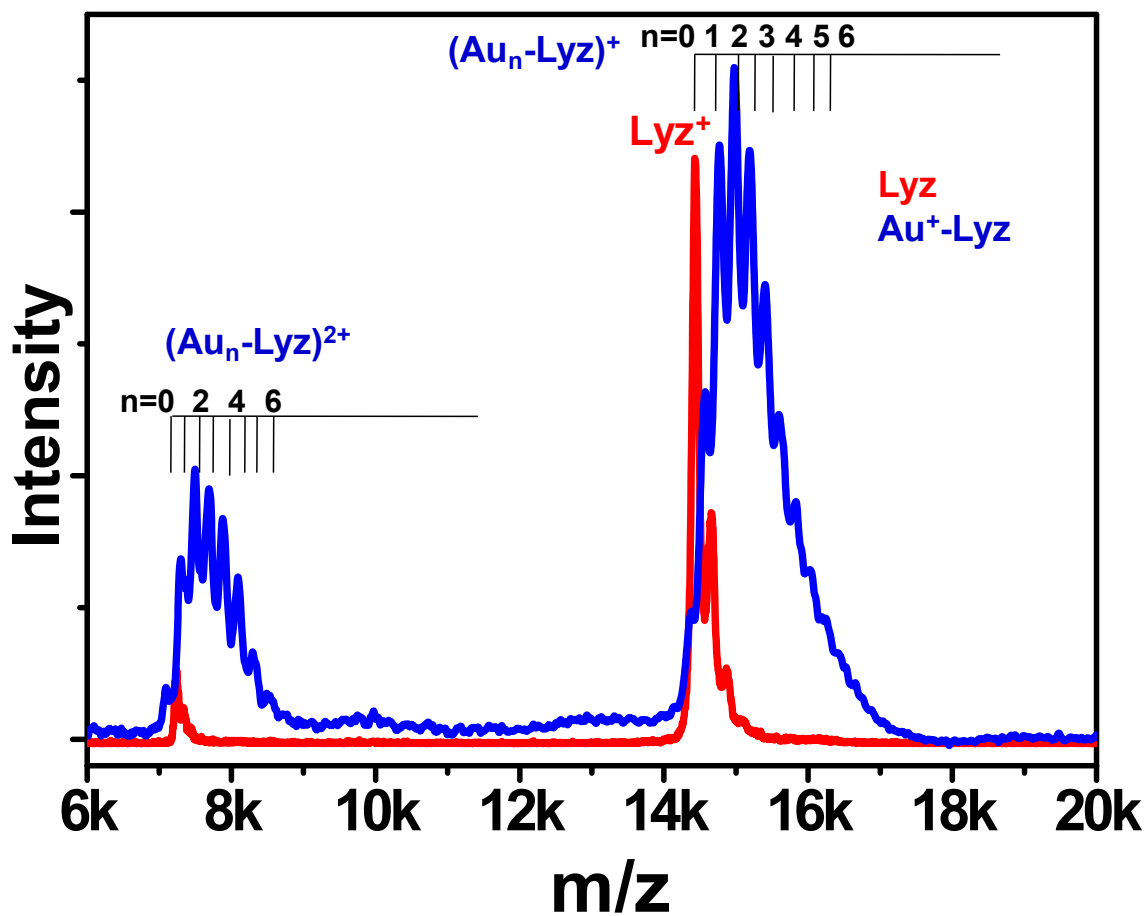

**Figure S4:** MALDI MS of  $\text{Au}^+-\text{Lyz}$  adduct showing multiple Au attachments to the parent protein with a separation of  $m/z$  197 due to Au. Corresponding double charge state was also observed with  $m/z \sim 99$  separation due to  $\text{Au}^{2+}$ .

Electronic Supplementary Information 5

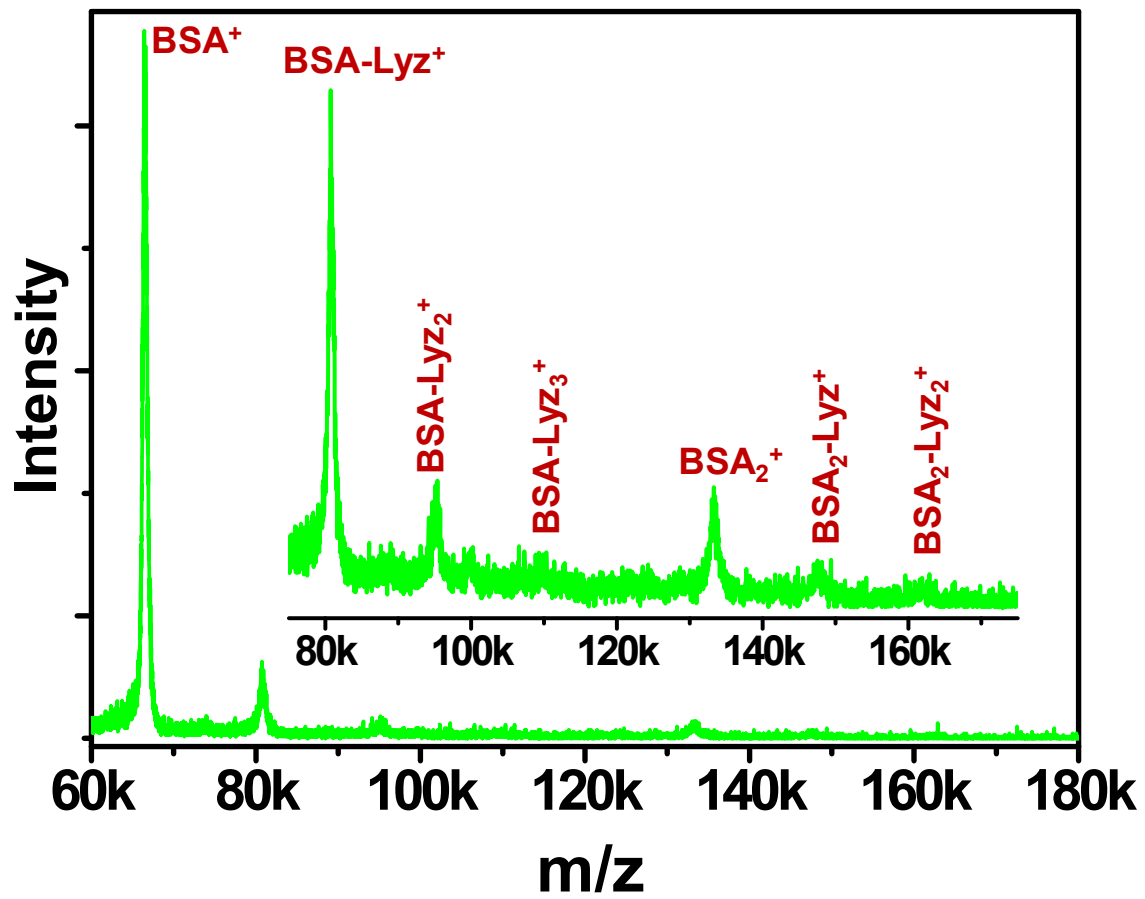

Figure S5: MALDI MS of BSA-Lyz is showing aggregate formation between two proteins.

Electronic Supplementary Information 6

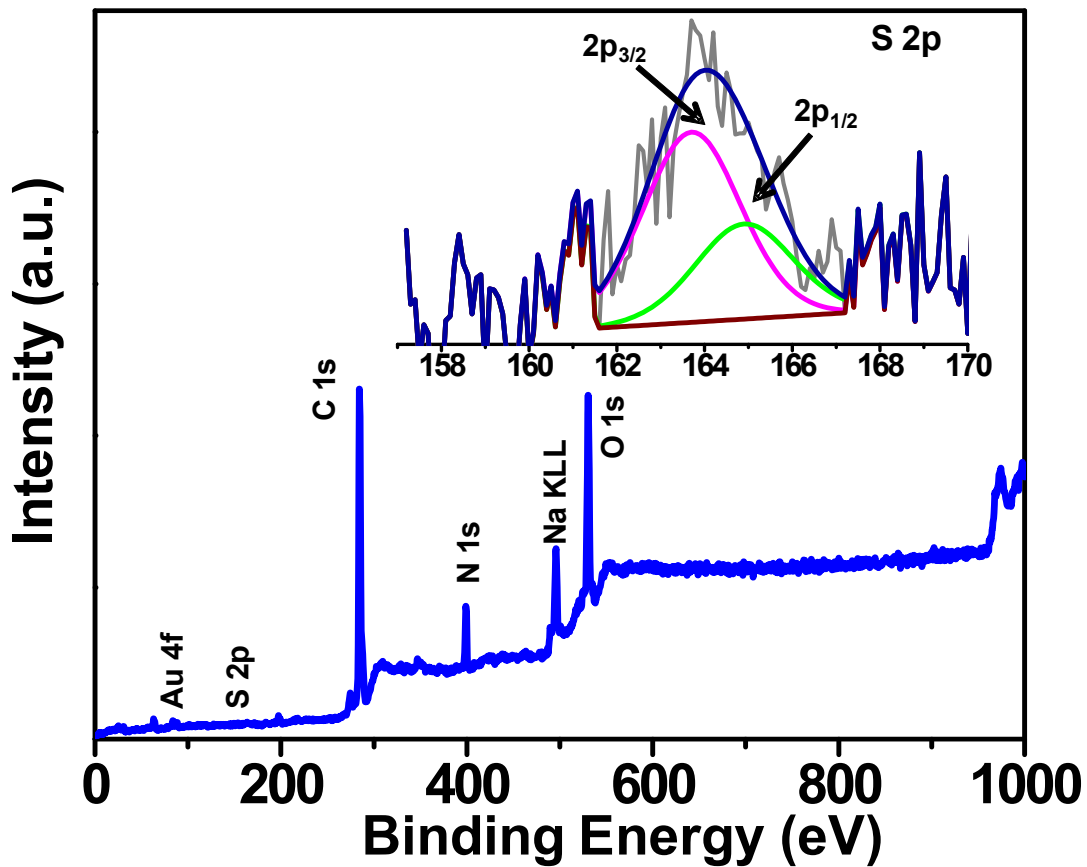

**Figure S6:** XPS survey spectrum of Au<sub>QC</sub>@BSA-Lyz is showing the presence of respective elements. The S 2p region is expanded in the inset.

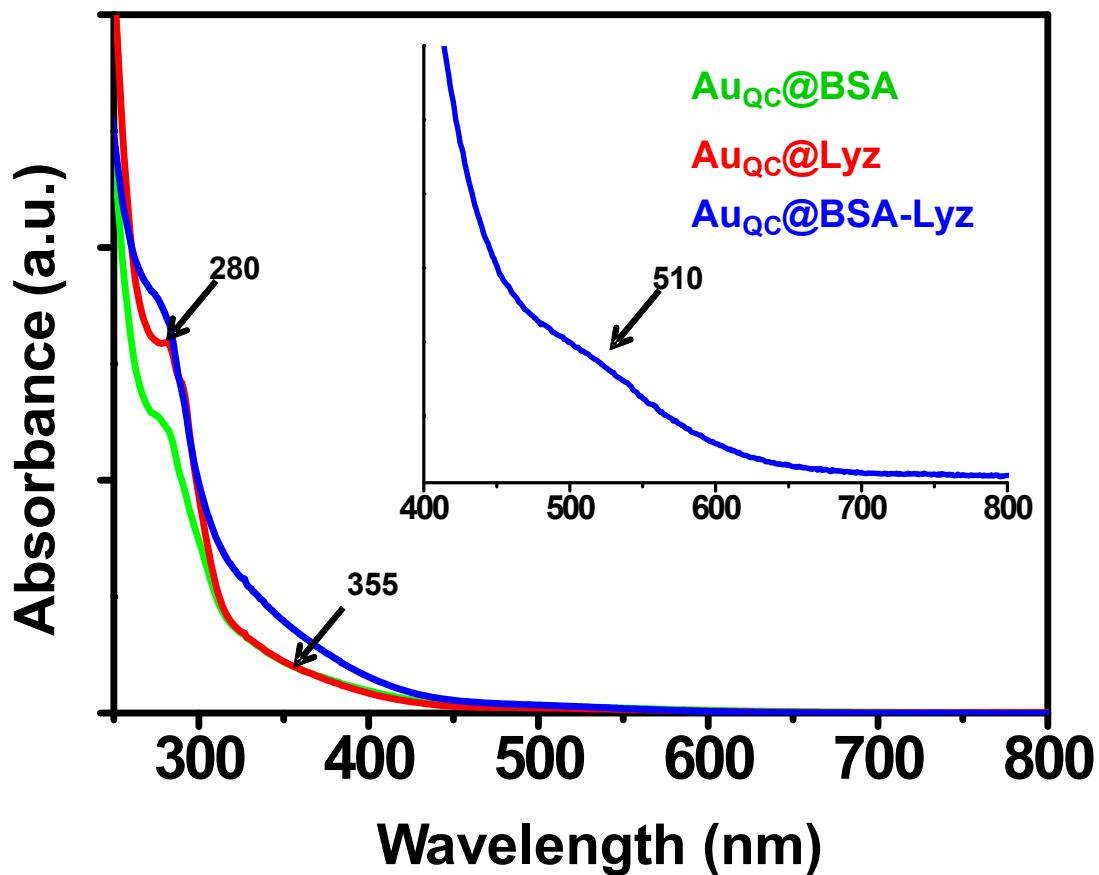

**Figure S7:** UV-Vis absorption spectra of Au<sub>QC</sub>@BSA-Lyz is showing a hump at 510 nm which was originally absent for individual clusters, ~Au<sub>30</sub>@BSA and Au<sub>10</sub>@Lyz.



Electronic Supplementary Information 8

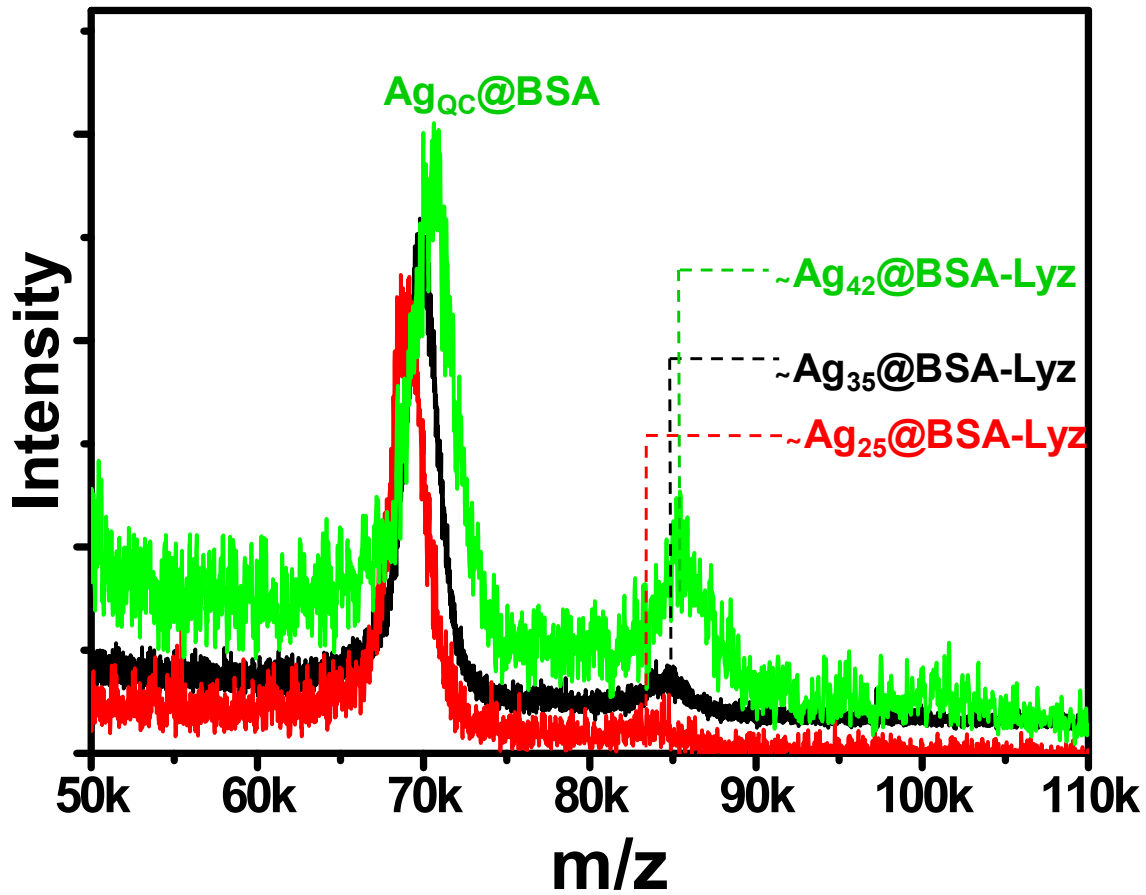

**Figure S8:** Concentration dependent MALDI MS of  $Ag_{QC}@BSA-Lyz$  showing linear dependence of Ag concentration and number of core Ag atoms.
